# Supplementary material
Source: PubMed Central journal article supplement (PMC5433836)

Figure S2. Residues with nonlinear  $^1\text{H}$ - $^{15}\text{N}$  NMR peak shifts upon LPPEERLI binding to PDZ $^{156-255}$

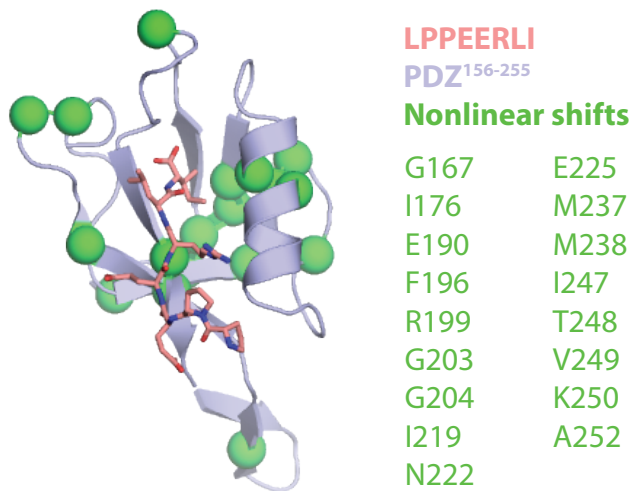

Supplement: NIHMS859074-supplement-SI.pdf [file NIHMS859074-supplement-SI.pdf]
